# Supplementary material
Source: MDPI journal article supplement (https://www.mdpi.com/2571-6255/2/2/30)
Supplement: s1 [file s1]

# We're not Doing Enough Prescribed Fire in the Western United States to Mitigate Wildfire Risk

Crystal A. Kolden

**Table S1.** Hectares under each primary land management agency delineated in the SIT Report and Wildland Fire Summaries by Geographic Area Coordination Center (GACC) region. State/Other includes federal agencies (including Department of Defense, Department of Energy, and Bureau of Reclamation) that include a substantial amount of land base but are not considered the five primary federal land management agencies, in addition to state and private lands (ST/OT essentially includes the rest of the US outside of the primary five federal agencies). The five primary agencies are Bureau of Indian Affairs (BIA), Bureau of Land Management (BLM), Fish and Wildlife Service (FWS), National Park Service (NPS), and United States Forest Service (USFS).

| GACC           | BIA     | BLM        | FWS        | NPS        | USFS       | ST/OT       | Total       |
|----------------|---------|------------|------------|------------|------------|-------------|-------------|
| Alaska         | 0       | 29,428,258 | 36,728,141 | 21,845,551 | 9,506,448  | 53,397,243  | 150,905,641 |
| Eastern        | 314,170 | 0          | 595,726    | 479,572    | 8,174,049  | 161,726,828 | 171,290,345 |
| Great Basin    | 6,326   | 33,205,524 | 813,227    | 1,724,255  | 13,568,884 | 20,102,814  | 69,421,030  |
| No. Rockies    | 22,172  | 3,113,646  | 628,403    | 1,328,685  | 11,639,566 | 46,170,079  | 62,902,551  |
| Northwest      | 0       | 6,322,172  | 628,560    | 867,703    | 11,296,290 | 23,831,784  | 42,946,509  |
| No. California | 0       | 1,448,622  | 90,955     | 341,121    | 5,510,235  | 10,243,579  | 17,634,512  |
| So. California | 20,201  | 7,483,020  | 52,782     | 3,168,544  | 3,763,152  | 10,665,535  | 25,153,234  |
| Rocky Mtns     | 37,331  | 10,257,000 | 222,212    | 499,310    | 10,858,396 | 88,619,490  | 110,493,739 |
| Southern       | 0       | 0          | 1,386,426  | 1,342,103  | 9,907,884  | 178,474,315 | 191,110,728 |
| Southwest      | 23,492  | 8,411,255  | 816,929    | 1,366,579  | 9,227,048  | 70,911,844  | 90,757,147  |
| TOTAL          | 423,692 | 99,669,497 | 41,963,361 | 32,963,423 | 93,451,952 | 664,143,511 | 932,615,436 |
